# Supplementary material for: Nationwide Association of Surgical Performance of Minimally Invasive Esophagectomy With Patient Outcomes
Source: PubMed Central journal article supplement — JAMA Netw Open. 2024 Apr 19;7(4):e246556. doi: 10.1001/jamanetworkopen.2024.6556 (PMC11031683; doi:10.1001/jamanetworkopen.2024.6556), 2024-04-19
Supplement: jamanetwopen-e246556-s001.pdf [file jamanetwopen-e246556-s001.pdf]

## Supplemental Online Content

Ketel MHM, Klarenbeek BR, Abma I, et al; MIE-CAT Netherlands Collaborative Group. Nationwide association of surgical performance of minimally invasive esophagectomy with patient outcomes. *JAMA Netw Open*. 2024;7(4):e246556. doi:10.1001/jamanetworkopen.2024.6556

**eMethods 1.** MIE-CAT Scores Calculation

**eMethods 2.** Multilevel Confounders

**eTable 1.** Characteristics of the Participating Hospitals

**eTable 2.** Overview of Surgeons in Participating Centers

**eTable 3.** Patient Characteristics

**eTable 4.** Multilevel Analysis of Oncologic Results

**eTable 5.** Additional Multilevel Analysis Results

**eTable 6.** Performance Scores Between International and Dutch Experts

**eFigure 1.** Performance vs Experience (No. of MIEs Over 2 Years)

**eFigure 2.** Performance vs Volume (No. of MIE Cases Over 2 Years)

**eFigure 3.** Total MIE-CAT Score Per Operation Type

**eAppendix.** MIE-CAT Netherlands Collaborative Group

This supplemental material has been provided by the authors to give readers additional information about their work.

## eMethods 1. MIE-CAT Score Calculation

### MIE-CAT overview:

| Procedural Phase                          | MIE-CAT score, based on Delphi lymph nodes | MIE-CAT score, based on center's lymph nodes |
|-------------------------------------------|--------------------------------------------|----------------------------------------------|
| 1. Mobilization of the greater curvature  |                                            |                                              |
| 2. Mobilization of the lesser curvature   |                                            |                                              |
| 3. Dissection of abdominal lymph nodes    | *                                          | *                                            |
| 4. Dissection of the hiatus               |                                            |                                              |
| 5. Creation of the gastric tube           |                                            |                                              |
| 6. Mobilization of the thoracic esophagus |                                            |                                              |
| 7. Dissection of thoracic lymph nodes     | *                                          | *                                            |
| 8. Creation of the anastomosis            | <sup>a</sup>                               | <sup>a</sup>                                 |

Phase scores ranged 4 to 16, quality component scores 8-32 and total MIE-CAT score 32-128.

### <sup>a</sup>The online MIE-CAT version with anastomosis techniques:

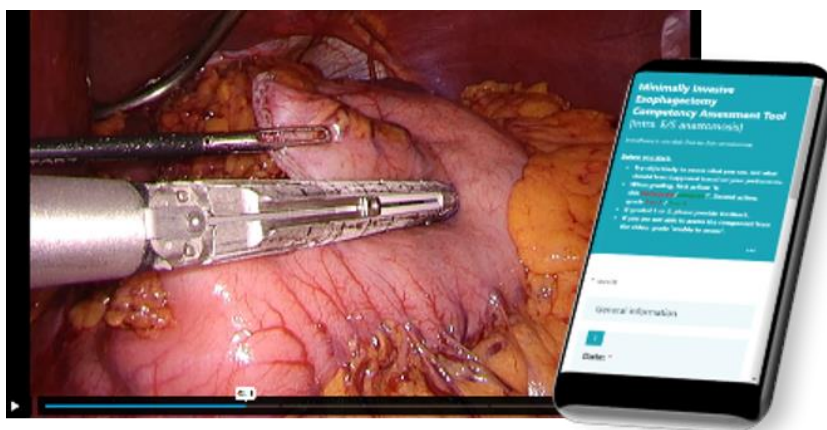

Minimally Invasive Esophagectomy Competency Assessment Tool [Intrathoracic S/S anastomosis]

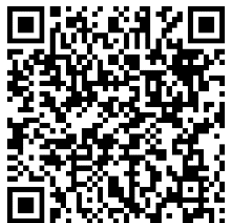

Minimally Invasive Esophagectomy Competency Assessment Tool [Intrathoracic E/S anastomosis]

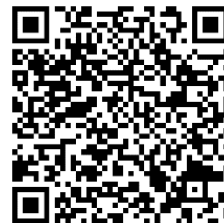

Minimally Invasive Esophagectomy Competency Assessment Tool [Cervical E/E anastomosis]

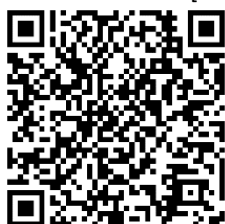

Minimally Invasive Esophagectomy Competency Assessment Tool [Cervical E/S anastomosis]

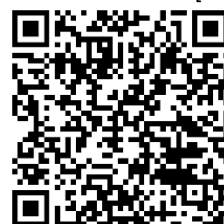

**\*Differences of lymph node dissection scoring:**

Phase 3: Dissection of abdominal lymph nodes

|                     | MIE-CAT score,<br>based on Delphi lymph nodes | MIE-CAT score,<br>based on center's lymph nodes |
|---------------------|-----------------------------------------------|-------------------------------------------------|
| Exposure            |                                               |                                                 |
| Execution           |                                               |                                                 |
| Adverse events      |                                               |                                                 |
| End-product quality | * 14, 15, 16, 17 proximal, 18                 | * example center 1: 15, 16, 17                  |

Phase 7: Dissection of thoracic lymph nodes

|                     | MIE-CAT score,<br>based on Delphi lymph nodes | MIE-CAT score,<br>based on center's lymph nodes                              |
|---------------------|-----------------------------------------------|------------------------------------------------------------------------------|
| Exposure            |                                               |                                                                              |
| Execution           |                                               |                                                                              |
| Adverse events      |                                               |                                                                              |
| End-product quality | *9, 11, 12, 13 right pulmonary<br>ligament    | * example center 1: 2, 6, 7, 8, 9 10,<br>11, 12, 13 right pulmonary ligament |

## eMethods 2. Multilevel Confounders

Overview of confounders used for the multilevel analysis.

| <b>Covariates</b>   | <b>Definition</b>                                                                                                                                    |
|---------------------|------------------------------------------------------------------------------------------------------------------------------------------------------|
| Sex                 | Sex of the patient (female or male)                                                                                                                  |
| Age                 | Age of the patient at time of surgery (>18)                                                                                                          |
| BMI                 | Body mass index (kg/m <sup>2</sup> )                                                                                                                 |
| Comorbidity         | ASA classification before resection (ASA 1&2 or ASA 3&4)                                                                                             |
| Neoadjuvant therapy | Neoadjuvant treatment before resection (no, chemotherapy or chemoradiotherapy)                                                                       |
| Clinical T-stage    | Tumor size or area of cancer (T1&2, T3 or T4)                                                                                                        |
| Clinical N-stage    | Spread to lymph nodes (N0, N1, N2 or N3&N+)                                                                                                          |
| Tumor location      | Location of the tumor with low (intrathoracic distal & gastro-esophageal junction) or high (cervical, intrathoracic proximal & intrathoracic middle) |
| Anastomosis type    | Type of anastomosis (cervical or intrathoracic & intra-abdominal)                                                                                    |
| Case difficulty     | Abdominal and thoracic case difficulty, scored during video assessment with a 1-5 Likert scale with 1 being very easy and 5 being very difficult     |

**eTable 1. Characteristics of the Participating Hospitals**

|                                                                                                    |                  |
|----------------------------------------------------------------------------------------------------|------------------|
| <i>Experience</i>                                                                                  |                  |
| <b>Surgical experience as consultant surgeon (incl. training), mean (SD, min-max), years</b>       | 21 (6.3, 10-32)  |
| <b>Surgical esophageal experience (incl. training and open surgery), mean (SD, min-max), years</b> | 15 (6.4, 4-26)   |
| <b>MIE experience (incl. training), mean (SD, min-max), years</b>                                  | 10 (3.7, 4-19)   |
| <b>Responsible for training and/or education (of fellows and surgeons in training), N (%)</b>      |                  |
| Surgical training and/or education                                                                 | 15 (100)         |
| MIE specific training                                                                              | 14 (93)          |
| Surgeons in training                                                                               | 15 (100)         |
| Fellows                                                                                            | 14 (93)          |
| MIE fellows                                                                                        | 9 (60)           |
| <b>Start with MIE in hospital, year (min-max)</b>                                                  | 2011 (2001-2017) |
| <b>Primary MIE anastomosis technique, N (%)</b>                                                    |                  |
| Intrathoracic                                                                                      | 10 (67)          |
| Cervical                                                                                           | 5 (33)           |
| <b>Type of surgery, N (%)</b>                                                                      |                  |
| Laparoscopic and thoracoscopic                                                                     | 8 (53)           |
| Robot-assisted                                                                                     | 7 (47)           |
| - Abdominal laparoscopic, thoracic part robot-assisted                                             | 4 (27)           |
| <i>Technique</i>                                                                                   |                  |
| <b>Number of MIEs/year with primary technique (n = 15), N (%)</b>                                  |                  |
| 5 – 25                                                                                             | 6 (40)           |
| 25 – 50                                                                                            | 6 (40)           |
| 50 – 75                                                                                            | 2 (13.3)         |
| > 75                                                                                               | 1 (6.7)          |
| <b>Number of MIEs performed during career (n = 15), N (%)</b>                                      |                  |
| 40-80 MIEs                                                                                         | 2 (13.3)         |
| 80-120 MIEs                                                                                        | 1 (6.7)          |
| > 120 MIEs                                                                                         | 12 (80)          |
| <b>Primary intrathoracic anastomosis (n = 10) , N (%)</b>                                          |                  |
| Circular stapled End-to-Side                                                                       | 3 (30)           |
| Linear stapled Side-to-Side                                                                        | 5 (50)           |
| Robot-assisted End-to-Side                                                                         | 2 (20)           |
| <b>Primary cervical anastomosis (n = 5), N (%)</b>                                                 |                  |
| Hand-sewn End-to-End                                                                               | 1 (20)           |
| Hand-sewn End-to-Side                                                                              | 4 (80)           |
| <i>Lymph node dissection</i>                                                                       |                  |
| <b>Abdominal lymph node stations (during routine primary MIE technique), N (%)</b>                 |                  |
| Paracardial                                                                                        |                  |
| • Left (#14/JPN 1)                                                                                 | 15 (100)         |
| • Right (#14/JPN 2)                                                                                | 15 (100)         |
| Left gastric artery (#15/JPN 3a&7)                                                                 | 15 (100)         |
| Left gastric vein (#15/JPN 3a&7)                                                                   | 15 (100)         |
| Celiac trunk (#16/JPN 9)                                                                           | 14 (93.3)        |
| Splenic artery                                                                                     |                  |
| • Proximal (#17/JPN 11p)                                                                           | 15 (100)         |
| • Distal (#17/JPN 11d)                                                                             | 5 (33.3)         |
| Common hepatic artery (#18/JPN 8a&p)                                                               | 14 (93.3)        |
| Hepatoduodenal ligament                                                                            |                  |
| • Portal vein (#19/JPN 12p)                                                                        | 6 (40)           |
| Proper hepatic (#19/JPN 12a&16)                                                                    | 6 (40)           |
| <b>Thoracic lymph node stations (during routine primary MIE technique), N (%)</b>                  |                  |
| Cervical superficialis (#1/JPN 100)                                                                | 1 (6.7)          |
| Cervical paraoesophageal (#2/JPN 101)                                                              | 2 (13.3)         |

|                                        |           |
|----------------------------------------|-----------|
| Upper paratracheal (#6/JPN 106pre&rec) | 3 (20)    |
| Lower paratracheal (#7/JPN 106tb)      | 8 (53.3)  |
| Aortopulmonary window (#8/JPN 113)     | 5 (33.3)  |
| Subcarinal (#9/JPN 107&109)            | 15 (100)  |
| Mediastinal paraoesophageal            |           |
| • Upper (#10/JPN 105)                  | 11 (73.3) |
| • Middle (#11/JPN 108)                 | 15 (100)  |
| • Lower (#12/JPN 110&111)              | 15 (100)  |
| Pulmonary ligament                     |           |
| • right (#13/JPN 112pulR)              | 14 (93.3) |
| left (#13/JPN 112pulLoa)               | 13 (86.7) |

Characteristics of the 15 Dutch hospitals, containing experience, technique, and standard lymph node dissection .  
If > 1 surgeon has filled in this questionnaire, the surgeon with the most experience was included.

**eTable 2. Overview of Surgeons in Participating Centers**

| Center | Number of attending esophageal surgeons | Number of attending esophageal surgeons in videos | MIE regularly assisted by non-attending surgeons (yes/no) |
|--------|-----------------------------------------|---------------------------------------------------|-----------------------------------------------------------|
| 1      | 2                                       | 2                                                 | Yes                                                       |
| 2      | 3                                       | 2                                                 | No                                                        |
| 3      | 3                                       | 2                                                 | Yes                                                       |
| 4      | 3                                       | 3                                                 | No                                                        |
| 5      | 3                                       | 2                                                 | Yes                                                       |
| 6      | 5                                       | 2                                                 | Yes                                                       |
| 7      | 2                                       | 2                                                 | No                                                        |
| 8      | 2                                       | 2                                                 | Yes                                                       |
| 9      | 3                                       | 3                                                 | No                                                        |
| 10     | 3                                       | 1                                                 | No                                                        |
| 11     | 3                                       | 3                                                 | Yes                                                       |
| 12     | 3                                       | 2                                                 | Yes                                                       |
| 13     | 4                                       | 3                                                 | Yes                                                       |
| 14     | 4                                       | 3                                                 | Yes                                                       |
| 15     | 3                                       | 3                                                 | No                                                        |

**eTable 3. Patient Characteristics**

|                                                         |  | <b>Low<br/>n = 102</b> | <b>Medium<br/>n = 617</b> | <b>High<br/>n = 219</b> | <b>p-value</b> |
|---------------------------------------------------------|--|------------------------|---------------------------|-------------------------|----------------|
| <b>Age</b> , mean (SD), y                               |  | 65.0 (8.3)             | 67.1 (9.1)                | 66.3 (9.2)              | 0.06           |
| <b>Sex</b> , N, male (%)                                |  | 83 (81.4)              | 432 (70.1)                | 179 (81.7)              | < 0.01         |
| <b>BMI</b> , mean (SD)                                  |  | 26.3 (4.1)             | 25.6 (4.5)                | 26.4 (4.6)              | 0.07           |
| <b>ASA</b> , N (%)                                      |  |                        |                           |                         |                |
| I                                                       |  | 7 (6.7)                | 45 (7.4)                  | 5 (2.3)                 | 0.01           |
| II                                                      |  | 63 (62.4)              | 356 (58.5)                | 127 (58.0)              |                |
| III                                                     |  | 31 (30.7)              | 203 (33.3)                | 78 (35.6)               |                |
| IV                                                      |  | 0                      | 5 (0.8)                   | 9 (4.1)                 |                |
| <b>Tumor type</b> , N (%)                               |  |                        |                           |                         |                |
| Adenocarcinoma                                          |  | 85 (83.3)              | 490 (68.3)                | 185 (84.5)              | 0.20           |
| SCC                                                     |  | 15 (14.7)              | 102 (17.0)                | 25 (11.4)               |                |
| Other                                                   |  | 2 (1.9)                | 7 (1.2)                   | 9 (4.1)                 |                |
| <b>Tumor location</b> , N (%)                           |  |                        |                           |                         |                |
| Cervical                                                |  | 0                      | 1 (0.2)                   | 0                       | 0.01           |
| Proximal thoracic                                       |  | 1 (1.0)                | 3 (0.5)                   | 1 (0.5)                 |                |
| Mid thoracic                                            |  | 8 (8.0)                | 84 (13.9)                 | 13 (5.9)                |                |
| Distal thoracic                                         |  | 86 (86.0)              | 426 (70.7)                | 162 (74.0)              |                |
| GE Junction                                             |  | 5 (5.0)                | 89 (14.8)                 | 43 (19.6)               |                |
| <b>Clinical T-Stage</b> , N (%)                         |  |                        |                           |                         |                |
| cTis                                                    |  | 0                      | 0                         | 1 (0.5)                 | 0.08           |
| cT1                                                     |  | 4 (3.9)                | 9 (14.6)                  | 3 (1.4)                 |                |
| cT2                                                     |  | 17 (16.7)              | 82 (13.3)                 | 42 (19.2)               |                |
| cT3                                                     |  | 71 (69.6)              | 482 (78.1)                | 165 (75.3)              |                |
| cT4                                                     |  | 5 (4.9)                | 23 (3.7)                  | 6 (2.7)                 |                |
| cTx                                                     |  | 5 (4.9)                | 21 (3.4)                  | 2 (0.9)                 |                |
| <b>Clinical N-Stage</b> , N (%)                         |  |                        |                           |                         |                |
| cN0                                                     |  | 32 (31.4)              | 238 (38.6)                | 74 (33.8)               | 0.08           |
| cN1                                                     |  | 38 (37.3)              | 223 (36.1)                | 77 (35.2)               |                |
| cN2                                                     |  | 26 (25.5)              | 110 (17.8)                | 55 (25.1)               |                |
| cN3                                                     |  | 4 (3.9)                | 16 (2.6)                  | 11 (5.0)                |                |
| cN+                                                     |  | 0                      | 11 (1.8)                  | 1 (0.5)                 |                |
| cNx                                                     |  | 2 (2.0)                | 19 (3.1)                  | 1 (0.5)                 |                |
| <b>Neoadjuvant therapy</b> , N (%)                      |  |                        |                           |                         |                |
| None                                                    |  | 6 (5.9)                | 22 (3.5)                  | 5 (2.3)                 | 0.04           |
| Chemoradiotherapy                                       |  | 5 (4.9)                | 55 (8.9)                  | 9 (4.1)                 |                |
| Chemotherapy                                            |  | 91 (89.2)              | 540 (87.5)                | 205 (93.6)              |                |
| <b>Anastomosis location</b> , N (%)                     |  |                        |                           |                         |                |
| Intrathoracic                                           |  | 74 (73.3)              | 445 (72.5)                | 209 (95.9)              | < 0.01         |
| Cervical                                                |  | 27 (26.7)              | 169 (27.5)                | 9 (4.1)                 |                |
| <b>Peroperative complications</b> , N (%)               |  | 8 (7.8)                | 28 (4.5)                  | 6 (2.7)                 | 0.12           |
| <b>Conversion</b> , N (%)                               |  | 9 (8.9)                | 20 (3.2)                  | 4 (1.8)                 | 0.01           |
| <b>Postoperative complications &lt; 30 days</b> , N (%) |  |                        |                           |                         |                |
| All                                                     |  | 67 (65.7)              | 378 (61.3)                | 101 (46.1)              | < 0.01         |
| Of which Clavien-Dindo ≥ 3                              |  | 40 (39.2)              | 174 (28.2)                | 41 (18.7)               | < 0.01         |
| Anastomotic leakage                                     |  | 18 (17.7)              | 91 (14.8)                 | 10 (4.5)                | < 0.01         |
| <b>Textbook outcome</b> , N (%)                         |  | 51 (50.0)              | 305 (49.4)                | 144 (65.8)              | < 0.01         |
| <b>ICU stay</b> , mean (min-max), days                  |  | 2.6 (6.9)              | 3.2 (7.6)                 | 2.2 (5.4)               | 0.17           |



|                                         |  |             |             |            |        |
|-----------------------------------------|--|-------------|-------------|------------|--------|
| <b>Removed lymph nodes, N (min-max)</b> |  | 27.0 (10.5) | 33.0 (13.7) | 29.3 (9.6) | < 0.01 |
| <b>R0 resection, N (%)</b>              |  | 97 (95.1)   | 589 (95.9)  | 182 (94.8) | 0.77   |
| <b>30-day mortality, N (%)</b>          |  | 3 (2.9)     | 16 (2.6)    | 8 (3.7)    | 0.72   |
| <b>Re-intervention, N (%)</b>           |  | 27 (26.5)   | 168 (27.4)  | 35 (16.0)  | 0.01   |
| <b>Re-admission, N (%)</b>              |  | 22 (22.0)   | 104 (17.5)  | 32 (14.7)  | 0.27   |

Numerical: One-way ANOVA and Binary/Ordinal: Chi-square test

**eTable 4. Multilevel Analysis of Oncologic Results**

| <b>RR (95% CI)</b>                 | Three experts        | External reviewer    | Dutch experts        |
|------------------------------------|----------------------|----------------------|----------------------|
| Outcome vs.<br>MIE-CAT (component) | n = 876              | n = 733 <sup>a</sup> | n = 733 <sup>a</sup> |
| <b>R0 resection vs.</b>            |                      |                      |                      |
| Total MIE-CAT                      | 1.000 (0.995, 1.005) | 0.984 (0.997, 1.002) | 1.000 (0.998, 1.002) |
| Phase 4                            | 1.004 (0.971, 1.028) | 0.997 (0.983, 1.007) | 0.998 (0.971, 1.016) |
| Phase 4 EPQ                        | 0.989 (0.780, 1.033) | 0.978 (0.870, 1.021) | 1.013 (0.917, 1.037) |
| Phase 6                            | 1.018 (0.992, 1.037) | 1.004 (0.988, 1.015) | 1.002 (0.985, 1.014) |
| Phase 6 EPQ                        | 1.041 (0.977, 1.066) | 1.002 (0.544, 1.042) | 1.012 (0.958, 1.032) |
| Phases 4&6                         | 1.009 (0.992, 1.024) | 0.999 (0.988, 1.008) | 1.000 (0.988, 1.010) |
| Phases 4&6 EPQ                     | 1.025 (0.969, 1.054) | 0.980 (0.878, 1.021) | 1.008 (0.975, 1.026) |
| <b>Removed lymph nodes (#) vs.</b> |                      |                      |                      |
| Total MIE-CAT                      | 0.936 (0.449, 1.640) | 1.125 (0.660, 1.705) | 0.871 (0.480, 1.419) |
| Phase 3                            | 1.601 (0.142, 3.062) | 1.865 (0.308, 3.092) | 0.220 (0.001, 2.989) |
| Phase 3 EPQ                        | 3.189 (0.009, 3.205) | 2.266 (0.000, 3.275) | 3.258 (0.000, 3.275) |
| Phase 7                            | 0.173 (0.000, 3.194) | 0.201 (0.001, 3.128) | 0.000 (0.000, 1.490) |
| Phase 7 EPQ                        | 3.205 (3.205, 3.205) | 0.000 (0.000, 2.596) | 3.275 (2.495, 3.275) |
| Phases 3 & 7                       | 1.287 (0.139, 2.913) | 1.490 (0.199, 2.998) | 0.065 (0.001, 1.857) |
| Phases 3 & 7 EPQ                   | 3.202 (0.267, 3.205) | 3.267 (0.000, 3.275) | 3.275 (0.000, 3.275) |

**eTable 5. Additional Multilevel Analysis Results**

| Performance vs. clinical outcome                    | Risk Ratio (RR), 95% CI |
|-----------------------------------------------------|-------------------------|
| <b>Severe postoperative complication (CD≥3) vs.</b> |                         |
| • Surgical performance (total MIE-CAT)              | 0.504 (0.235, 0.991)    |
| • Total adverse event                               | 0.556 (0.278, 1.150)    |
| <b>Postoperative complication vs.</b>               |                         |
| • Surgical performance (total MIE-CAT)              | 0.537 (0.242, 0.959)    |
| • Total adverse event                               | 0.618 (0.342, 0.960)    |
| <b>Anastomotic leakage vs.</b>                      |                         |
| • Surgical performance (total MIE-CAT)              | 0.360 (0.100, 1.200)    |
| • Total adverse event                               | 0.691 (0.239, 1.798)    |
| • Creation of the gastric tube (p 5)                | 0.726 (0.330, 1.511)    |
| • Creation anastomosis (p 8)                        | 0.139 (0.061, 0.313)    |
| <b>Pulmonary complication vs.</b>                   |                         |
| • Surgical performance (total MIE-CAT)              | 0.664 (0.381, 1.091)    |
| • Total adverse event                               | 0.821 (0.467, 1.431)    |
| <b>Peroperative complication vs.</b>                |                         |
| • Surgical performance (total MIE-CAT)              | 0.205 (0.044, 0.937)    |
| • Total adverse event                               | 0.223 (0.062, 0.782)    |
| <b>Conversion vs.</b>                               |                         |
| • Surgical performance (total MIE-CAT)              | 0.211 (0.210, 0.212)    |
| • Total adverse events                              | 0.398 (0.395, 0.400)    |
| <b>Reintervention vs.</b>                           |                         |
| • Surgical performance (total MIE-CAT)              | 0.545 (0.269, 1.030)    |
| • Total adverse event                               | 0.647 (0.373, 1.067)    |
| • End-product quality                               | 0.578 (0.285, 1.088)    |
| <b>ICU stay vs.</b>                                 |                         |
| • Surgical performance (total MIE-CAT)              | 0.220 (0.030, 1.554)    |
| • Total adverse event                               | 0.242 (0.058, 0.997)    |
| • End-product quality                               | 0.170 (0.028, 0.996)    |
| <b>Readmission vs.</b>                              |                         |
| • Surgical performance (total MIE-CAT)              | 0.973 (0.502, 1.747)    |
| • Total adverse event                               | 0.940 (0.536, 1.564)    |
| <b>Textbook outcome vs.</b>                         |                         |
| • Surgical performance (total MIE-CAT)              | 1.448 (0.951, 9.980)    |
| • Total adverse event                               | 1.234 (0.764, 4.770)    |
| • End-product quality                               | 1.288 (0.708, 7.040)    |
| • Creation anastomosis (p 8)                        | 1.448 (1.153, 6.440)    |
| <b>30-day mortality vs.</b>                         |                         |
| • Surgical performance (total MIE-CAT)              | 1.440 (0.262, 6.822)    |
| • Total adverse event                               | 0.746 (0.149, 3.481)    |
| <b>R0 resection vs.</b>                             |                         |
| • Surgical performance (total MIE-CAT)              | 1.006 (0.849, 1.059)    |
| • Hiatus & thoracic esophagus dissection (p 4&6)    | 1.031 (0.959, 1.062)    |
| • End-product quality of p 4&6                      | 1.003 (0.997, 1.008)    |
| <b>Removed lymph nodes vs.</b>                      |                         |
| • Surgical performance (total MIE-CAT)              | 0.204 (0.000, 3.205)    |
| • End-product quality                               | 0.019 (0.000, 3.205)    |
| • Dissection of abdominal lymph nodes (p 3)         | 2.653 (0.002, 3.205)    |
| • End-product quality p3                            | 3.106 (0.041, 3.205)    |
| • Dissection of thoracic lymph nodes (p 7)          | 1.111 (0.269, 2.414)    |
| • End-product quality p7                            | 3.195 (3.107, 3.204)    |
| • Complete lymph node dissection (p 3,4,7)          | 1.799 (0.000, 3.205)    |
| • End-product quality p3,4,7                        | 3.179 (0.004, 3.205)    |

Multilevel risk ratio (RR) associations between (MIE-CAT (component) scores of the high- vs. low-performance hospitals and clinical outcomes. Two hospitals with missing phases were excluded for total MIE-CAT, but included for complete MIE-CAT component analysis.

**eTable 6. Performance Scores Between International and Dutch Experts**

| Center ID | Video ID | Anastomosis type | External expert, mean (SD) | Dutch experts, mean (SD) | Difference |
|-----------|----------|------------------|----------------------------|--------------------------|------------|
| 1         | 1        |                  | X                          | 69.7*                    | X          |
| 1         | 2        |                  | X                          | 67.5*                    | X          |
| 2         | 1        | Cerv E/E         | 97,7                       | 103,6                    | -5,9       |
| 2         | 2        | Cerv E/E         | 123,8                      | 115,3                    | 8,6        |
| 3         | 1        | Intra E/S        | 112,0                      | 94,3                     | 17,7       |
| 3         | 2        | Intra E/S        | 106,8                      | 109,1                    | -2,3       |
| 4         | 1        | Intra E/S        | 109,8                      | 108,8                    | 1,0        |
| 4         | 2        | Intra E/S        | 105,3                      | 106,0                    | -0,7       |
| 5         | 1        |                  | X                          | 86.5**                   | X          |
| 5         | 2        |                  | X                          | 65.4*                    | X          |
| 6         | 1        | Intra E/S        | 121,5                      | 110,3                    | 11,3       |
| 6         | 2        |                  | X                          | 103.2                    | X          |
| 7         | 1        | Intra E/S        | 102,8                      | 111,9                    | -9,1       |
| 7         | 2        |                  | X                          | 109.6                    | X          |
| 8         | 1        | Intra S/S        | 122,0                      | 113,7                    | 8,3        |
| 8         | 2        | Intra S/S        | 128,0                      | 117,1                    | 10,9       |
| 9         | 1        | Cerv E/S         | 72,0                       | 105,2                    | -33,3      |
| 9         | 2        | Intra E/S        | 102,6                      | 104,8                    | -2,2       |
| 10        | 1        |                  | X                          | 107.0                    | X          |
| 10        | 2        |                  | X                          | 93.8**                   | X          |
| 11        | 1        | Intra S/S        | 127,0                      | 117,3                    | 9,7        |
| 11        | 2        | Intra S/S        | 111,8                      | 110,0                    | 1,8        |
| 12        | 1        |                  | X                          | 97.9                     | X          |
| 12        | 2        |                  | X                          | 103.9                    | X          |
| 13        | 1        | Intra S/S        | 110,0                      | 107,5                    | 2,5        |
| 13        | 2        | Intra S/S        | 82,2                       | 97,5                     | -15,3      |
| 14        | 1        | Intra S/S        | 92,6***                    | 80,5***                  | 12,0       |
| 14        | 2        | Intra S/S        | 102,8                      | 98,1                     | 4,7        |
| 15        | 1        | Intra S/S        | 82,8                       | 86,1                     | -3,3       |
| 15        | 2        | Intra S/S        | 101,5                      | 103,4                    | -1,9       |

The international expert reviewed 20 of the 30 videos. Absent scores are displayed with 'X'. \*Missing components phase 5 and 8, \*\* missing component phase 5 and \*\*\* missing component phase 8

**eFigure 1. Performance vs Experience (No. of MIEs Over 2 Years)**

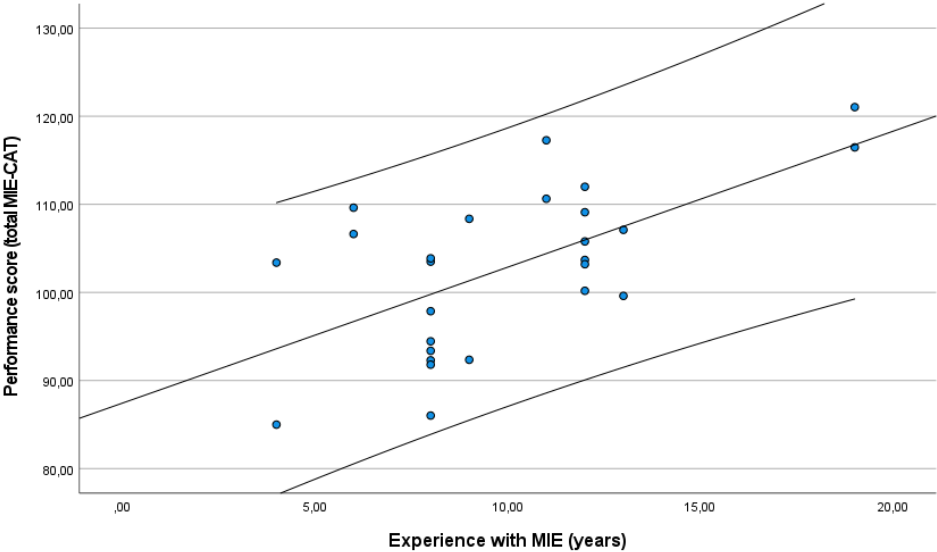

*Pearson's r = 0.614, 95% CI [0.297, 0.809]*

**eFigure 2. Performance vs Volume (No. MIE Cases Over 2 Years)**

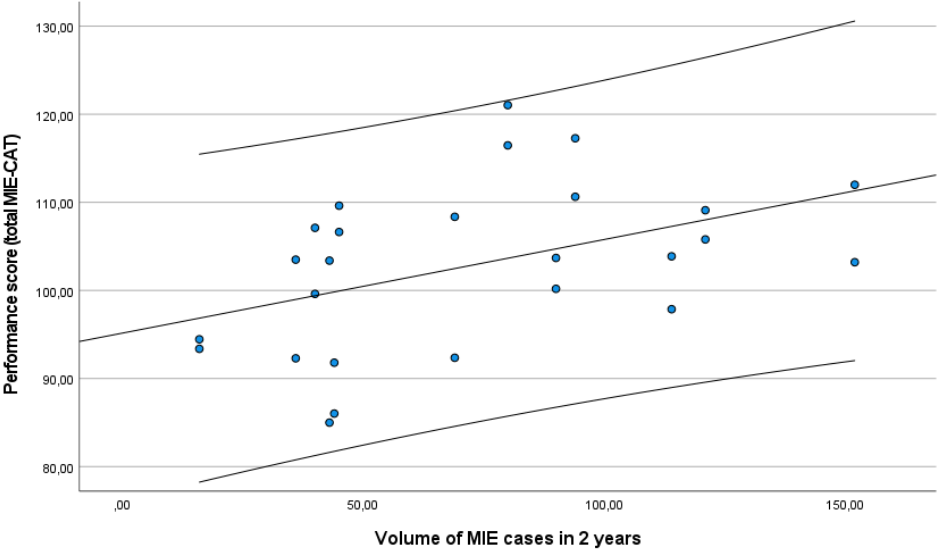

*Pearson's r = 0.447, 95% CI [0.072, 0.711]*

**eFigure 3. Total MIE-CAT Score Per Operation Type**

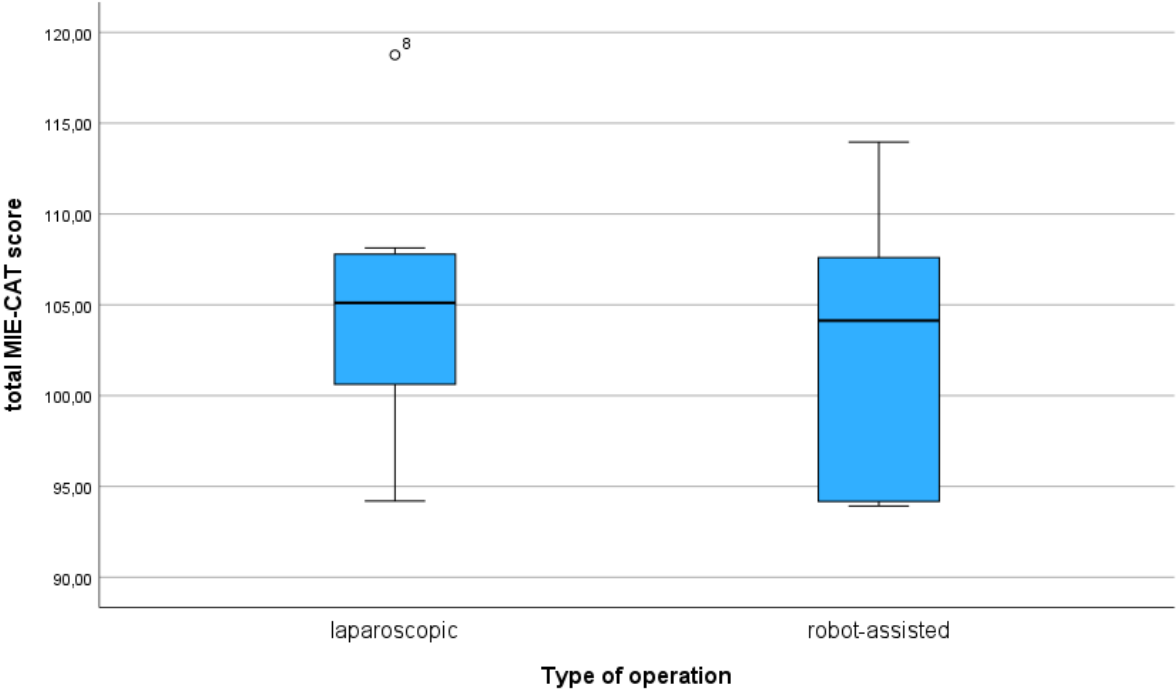

## eAppendix. MIE-CAT Netherlands Collaborative Group

| <b>Participating hospitals</b>                                                           | <b>Study collaborator(s), first and last name</b>                                                                           |
|------------------------------------------------------------------------------------------|-----------------------------------------------------------------------------------------------------------------------------|
| Amsterdam UMC, Amsterdam, the Netherlands                                                | Suzanne Gisbertz<br>Mark I. van Berge Henegouwen<br>Nannet Schuring                                                         |
| Catharina Hospital Eindhoven, the Netherlands                                            | Grard Nieuwenhuijzen<br>Misha Luyer<br>Tessa Geraedts                                                                       |
| Erasmus MC University Medical Center Rotterdam, the Netherlands                          | Bas Wijnhoven<br>Pieter van der Sluis<br>Sjoerd Lagarde                                                                     |
| Elisabeth-Tweesteden Hospital, Tilburg, the Netherlands                                  | Joos Heisterkamp                                                                                                            |
| Gelre Ziekenhuis, Apeldoorn, the Netherlands                                             | Peter van Duijvendijk                                                                                                       |
| Leiden University Medical Center, Leiden, the Netherlands                                | Wobbe de Steur                                                                                                              |
| Maasstad Ziekenhuis, Rotterdam, the Netherlands                                          | Peter-Paul Coene                                                                                                            |
| Medical Center Leeuwarden, Leeuwarden, the Netherlands                                   | Marloes Emous<br>Jean-Pierre Pierie<br>Daniël Hess                                                                          |
| Netherlands Cancer Institute, Amsterdam, the Netherlands                                 | Johanna van Sandick<br>Koen (K.J.) Hartemink<br>Xander (A.A.F.A) Veenhof                                                    |
| Queen Mary Hospital, Hong Kong, China                                                    | Simon Law                                                                                                                   |
| Radboud university medical center, Nijmegen, the Netherlands                             | Bastiaan Klarenbeek<br>Camiel Rosman<br>Merlijn Hutteman<br>Frans van Workum<br>Gerjon Hannink<br>Inger Abma<br>Mirte Ketel |
| Reinier de Graaf Groep, Delft, the Netherlands                                           | Stijn van Esser<br>Jan Willem Dekker                                                                                        |
| University Medical Center Groningen, University of Groningen, Groningen, the Netherlands | Jan Willem Haveman<br>Frederieke Dijkstra                                                                                   |
| University Medical Center Utrecht, Utrecht, the Netherlands                              | Jelle Ruurda<br>Richard van Hillegersberg                                                                                   |
| Hospital group Twente (ZGT), Almelo, the Netherlands                                     | Marc J. van Det<br>Ewout A. Kouwenhoven                                                                                     |
| Zuyderland, Heerlen, the Netherlands                                                     | Meindert Sosef<br>Eric Belgers<br>Bob Schaafsma                                                                             |
