# Supplementary material for: Nationwide Association of Surgical Performance of Minimally Invasive Esophagectomy With Patient Outcomes
Source: PubMed Central journal article supplement — JAMA Netw Open. 2024 Apr 19;7(4):e246556. doi: 10.1001/jamanetworkopen.2024.6556 (PMC11031683; doi:10.1001/jamanetworkopen.2024.6556), 2024-04-19
Supplement: jamanetwopen-e246556-s002.pdf [file jamanetwopen-e246556-s002.pdf]

## Supplemental Online Content: Nonauthor Collaborators

\*First name, last name, and suffix (if applicable) are required and will appear in PubMed.

| <b>*Group Name(s): MIE-CAT Netherlands Collaborative Group</b> |                      |                              |                         |                                      |                                                 |                                                                |                                                                                                   |
|----------------------------------------------------------------|----------------------|------------------------------|-------------------------|--------------------------------------|-------------------------------------------------|----------------------------------------------------------------|---------------------------------------------------------------------------------------------------|
| <b>*First Name and Middle Initial(s)</b>                       | <b>*Last Name</b>    | <b>*Suffix (eg, Jr, III)</b> | <b>Academic Degrees</b> | <b>Institution</b>                   | <b>Location (city, state/province, country)</b> | <b>Role or Contribution, eg, chair, principal investigator</b> | <b>Group (if more than 1 Group listed in the byline) and/or Subgroup (eg, Steering Committee)</b> |
| Mark I.                                                        | van Berge Henegouwen |                              | MD, PhD                 | Amsterdam UMC                        | Amsterdam, the Netherlands                      |                                                                |                                                                                                   |
| Nannet                                                         | Schuring             |                              | MD                      | Amsterdam UMC                        | Amsterdam, the Netherlands                      |                                                                |                                                                                                   |
| Misha                                                          | Luye                 |                              | MD, PhD                 | Catharina Hospital                   | Eindhoven, the Netherlands                      |                                                                |                                                                                                   |
| Tessa                                                          | Geraedts             |                              | MD                      | Catharina Hospital                   | Eindhoven, the Netherlands                      |                                                                |                                                                                                   |
| Sjoerd                                                         | Lagarde              |                              | MD, PhD                 | Erasmus MC University Medical Center | Rotterdam, the Netherlands                      |                                                                |                                                                                                   |
| Jean-Pierre                                                    | Pierie               |                              | MD, PhD                 | Medical Center Leeuwarden            | Leeuwarden, the Netherlands                     |                                                                |                                                                                                   |
| Daniël                                                         | Hess                 |                              | MD                      | Medical Center Leeuwarden            | Leeuwarden, the Netherlands                     |                                                                |                                                                                                   |
| Koen J.                                                        | Hartemink            |                              | MD                      | Netherlands Cancer Institute         | Amsterdam, the Netherlands                      |                                                                |                                                                                                   |
| Xander A.F.A.                                                  | Veenhof              |                              | MD                      | Netherlands Cancer Institute         | Amsterdam, the Netherlands                      |                                                                |                                                                                                   |
| Merlijn                                                        | Hutteman             |                              | MD, PhD                 | Radboud university medical center    | Nijmegen, the Netherlands                       |                                                                |                                                                                                   |
| Frederieke                                                     | Dijkstra             |                              | MD                      | University Medical Center Groningen  | Groningen, the Netherlands                      |                                                                |                                                                                                   |
| Richard                                                        | van Hillegersberg    |                              | MD, PhD                 | University Medical Center Utrecht    | Utrecht, the Netherlands                        |                                                                |                                                                                                   |
| Ewout A.                                                       | Kouwenhoven          |                              | MD, PhD                 | Hospital group Twente (ZGT)          | Almelo, the Netherlands                         |                                                                |                                                                                                   |
| Bob                                                            | Schaafsma            |                              | MD, PhD                 | Zuyderland                           | Heerlen, the Netherlands                        |                                                                |                                                                                                   |
