# Supplementary material for: Nationwide Association of Surgical Performance of Minimally Invasive Esophagectomy With Patient Outcomes
Source: PubMed Central journal article supplement — JAMA Netw Open. 2024 Apr 19;7(4):e246556. doi: 10.1001/jamanetworkopen.2024.6556 (PMC11031683; doi:10.1001/jamanetworkopen.2024.6556), 2024-04-19
Supplement: jamanetwopen-e246556-s003.pdf [file jamanetwopen-e246556-s003.pdf]

## Data Sharing Statement

Ketel. Nationwide Association of Surgical Performance of Minimally Invasive Esophagectomy With Patient Outcomes. *JAMA Netw Open*. Published April 19, 2024.

doi:10.1001/jamanetworkopen.2024.6556

### Data

**Data available:** No

### Additional Information

**Explanation for why data not available:** This study data is not openly available. The authors are willing to share the data upon reasonable request
